# Local Anesthetics Impair Human Granulocyte Phagocytosis Activity, Oxidative Burst, and CD11b Expression in Response to *Staphylococcus aureus*

Ralph-Thomas Kiefer, M.D.,\* Annette Ploppa, M.D.,\* Wolfgang A. Krueger, M.D.,\* Michael Plank,† Boris Nohé, M.D.,\* Helene A. Haeberle, M.D.,\* Klaus Unertl, M.D.,‡ Hans-Jürgen Dieterich, M.D.§

**Background:** With invasion of bacteria, the host defense system is activated by a complex cascade of various mechanisms. Local anesthetics previously were shown to interact with diverse components of the immune response, such as leukocyte adherence on endothelial monolayers, oxidative burst, or crosstalk within lymphocyte subset populations. However, effects of newer local anesthetics like bupivacaine and ropivacaine on antibacterial host defense—primarily phagocytosis activity, oxidative burst, or CD11b expression—still remain unclear.

**Methods:** Whole blood samples were preincubated with local anesthetics (lidocaine, 9.2, 92.2, and 1,846  $\mu\text{M}$ ; bupivacaine, 6.1, 61, and 770  $\mu\text{M}$ ; ropivacaine, 6.4, 64, and 801  $\mu\text{M}$ ). For the oxidative burst and CD11b assay, dihydroethidium was added to the probes. After viable *Staphylococcus aureus* was added in a 5 to 1 ratio following leukocyte count, phagocytosis was stopped at different times, and staining with monoclonal antibodies was performed for subsequent flow cytometric analysis of phagocytosis activity, oxidative burst, and CD11b expression.

**Results:** Granulocyte phagocytosis activity, CD11b expression, and generation of reactive oxygen species were significantly reduced by lidocaine ( $P < 0.0002$ ) and bupivacaine ( $P < 0.005$ ) in the highest concentration (1,846  $\mu\text{M}$  and 770  $\mu\text{M}$ , respectively). The capability of granulocytes to ingest bacteria was significantly depressed only by lidocaine ( $P < 0.003$ ). Ropivacaine had no significant effect on any parameter investigated.

**Conclusions:** Local anesthetic dose and structure dependently inhibit inflammatory and immunologic parameters of granulocyte functions. Ropivacaine shows low interference with granulocyte immunologic and inflammatory functions.

APART from their ability to block sodium channels, local anesthetics interact with various cell systems relevant to immune functions. These immunomodulatory actions of local anesthetics potentially may have both positive and negative effects.

Antiinflammatory actions of local anesthetics may be beneficial in settings of sterile inflammation. Depressed generation of reactive oxygen species and expression of CD11b in leukocytes in the presence of local anesthetics are associated with decreases in ischemic damage after myocardial infarction,<sup>1</sup> tissue inflammation in acute respiratory distress syndrome,<sup>2,3</sup> and ulcerative colitis<sup>4,5</sup> in

animal models and humans, although the latter finding has recently been contradicted.<sup>6</sup>

In contrast, examples of potential negative effects include retardation of wound healing and increased infectious complications, such as epidural abscess; whether such effects are clinically relevant remains to be shown.<sup>7,8</sup> Epidural abscesses represent a rare but severe complication of regional anesthesia. *Staphylococcus aureus* has been identified as the most common pathogen.<sup>9,10</sup> Although local anesthetics show a concentration-dependent antimicrobial activity on several types of bacteria *in vitro*,<sup>10-12</sup> *S. aureus* grows in the presence of local anesthetics.<sup>10</sup> This insensitivity of *S. aureus* to local anesthetics, in combination with an impaired host defense, has been suggested to facilitate infectious complications.<sup>10</sup>

*In vitro*, local anesthetic interactions with leukocyte functions in inflammatory models have been described repeatedly. Responses (chemotaxis, phagocytosis activity, cellular metabolic activity, and oxidative burst) to various experimental stimuli in the presence of lidocaine are inhibited.<sup>13-19</sup> In addition, CD11b expression, which is important for granulocyte adhesion, transmigration, and leukocyte-endothelial interactions, was shown to be impaired by local anesthetics.<sup>20</sup> However, local anesthetic interactions with the bacterial host defense, a possibly more relevant end point, have not been investigated in detail.

Based on these data, we hypothesized that, besides the well-known growth of *S. aureus* in the presence of local anesthetics, an interference of local anesthetics with leukocyte functions also might compromise host defense against this pathogen. To test this hypothesis, we investigated, in a model of whole blood infection with *S. aureus*, the impact of local anesthetics on three key leukocyte functions: expression of CD11b surface binding sites, the main recognition and binding sites for *S. aureus*<sup>21</sup>; phagocytosis, which internalizes the bacterium; and oxidative burst, which kills the bacterium.

## Materials and Methods

### Local Anesthetics

Three different concentrations of lidocaine (Xylocaine®; Astra, Wedel, Germany), bupivacaine (Carbostesin®; Astra, Wedel, Germany), and ropivacaine (Naropin®; Astra, Wedel, Germany) were chosen for investigation of their effect on granulocyte phagocytosis activity, oxidative burst,

\* Research Assistant, † Predoctoral Fellow, ‡ Professor and Chairman, § Assistant Professor.

Received from the Department of Anesthesiology and Intensive Care Medicine, Eberhard-Karls University, Tuebingen, Germany. Submitted for publication May 31, 2002. Accepted for publication December 13, 2002. Support was provided solely by institutional and/or departmental sources. Drs. Kiefer and Ploppa equally contributed to this work.

Address reprint requests to Dr. Kiefer: Center for Medical Research, Department of Anesthesiology and Intensive Care Medicine, Eberhard-Karls University Tuebingen, Waldhoernlestrasse 22, 72 072 Tuebingen, Germany. Address electronic mail to: thomas.kiefer@uni-tuebingen.de. Individual article reprints may be purchased through the Journal Web site, www.anesthesiology.org.

and CD11b expression. Preservative-free preparations of the local anesthetics were diluted in isotonic saline to a total volume of 100  $\mu$ l each. Final working concentrations of local anesthetic in whole blood were as follows: lidocaine, 9.2, 92.2 and 1,846  $\mu$ M; bupivacaine, 6.1, 61.6, and 770  $\mu$ M; and ropivacaine, 6.4, 64, and 801  $\mu$ M. The pH was 7.4 in all experiments. Eleven experiments were conducted for each local anesthetic in each concentration.

#### *Blood Samples*

After obtaining institutional and ethical committee approval (Medical Faculty, Eberhard-Karls University, Tübingen, Germany) and informed consent, blood samples (10 ml) were acquired from 14 healthy volunteers (aged  $32.5 \pm 7$  yr) via an 18-gauge needle in a large antecubital vein. Blood was heparinized with 5 U/ml heparin sodium (Vetren 200®; Byk Gulden, Konstanz, Germany). One hundred microliters of the samples was used for leukocyte count (using trypan blue solution with 3% acetic acid for lysis of erythrocytes). The remaining blood was divided into volumes of 2 ml and mixed with different concentrations of local anesthetic or with isotonic saline (not bacteriostatic) as control. Blood samples were incubated with the different local anesthetic concentrations for 30 min at 37°C.

#### *Bacteria*

*S. aureus* (ATCC 25923; American Type Culture Collection, Rockville, MD) was cultivated in Tryptone Soya Broth (Oxoid, Wesel, Germany) for 3 h and centrifuged (375 g) for 5 min. The pellet was resuspended in phosphate-buffered saline without calcium or magnesium (Sigma, Deisenhofen, Germany) and then washed twice to remove the growth medium. For the detection of intracellular bacteria by flow cytometry, the pellet was incubated with Calcein-AM (Calcein-AM special packing; Molecular Probes, Eugene, OR) for 50 min at 37°C. Calcein-AM, an acetoxymethyl ester with a high and stable green fluorescence signal, penetrates the cell wall, is cleaved by cytoplasmic esterases to a hydrophilic product, and is thereby trapped in the cell. Stained bacteria were washed twice in phosphate-buffered saline, adjusted to a final concentration of  $2 \times 10^9$  colony-forming units (CFU) per milliliter, and stored in aliquots at  $-20^\circ\text{C}$  until use. Bacterial count was performed by plating out appropriate dilutions of bacterial preparations on mannitol salt agar (Oxoid, Wesel, Germany) and counting CFU after 24 h of incubation at 37°C. Repeated assays were performed to ascertain stable fluorescence intensity and bacterial viability during all experiments. For the oxidative burst and CD11b assay, unstained bacteria were diluted to  $2 \times 10^9$  CFU/ml and stored at  $-20^\circ\text{C}$ .

#### *Phagocytosis*

To provide a constant 5 to 1 ratio of bacteria to leukocytes for each assay, bacteria were diluted based on whole blood leukocyte count. The culture medium was RPMI (RPMI 1640; Sigma, Deisenhofen, Germany) containing 10% autologous serum (to preopsonize bacteria and to provide for faster phagocytosis). Diluted bacteria and local anesthetic-treated whole blood samples were separately incubated for 30 min at 37°C. Bacteria were then added to the blood samples and incubated at 37°C for 10, 30, and 60 min before phagocytosis was stopped by adding *N*-ethylmaleimide (10 mM; Sigma, Deisenhofen, Germany). Between steps, the samples were stored on ice.

For flow cytometric detection, the granulocytes were stained with the monoclonal antibody against CD13 (Myeloid Cell, CD13 RPE; DAKO, Glostrup, Denmark), and the erythrocytes were lysed (Lysing Solution; Becton Dickinson, Heidelberg, Germany). The samples then were centrifuged (375 g for 5 min), resuspended in phosphate-buffered saline, and kept on ice until flow cytometric analysis.

#### *Oxidative Burst and CD11b Expression*

For determination of oxidative burst activity and CD11b expression of leukocytes, unstained bacteria were mixed with leukocytes to a final ratio of 5 to 1 and preopsonized, as in the phagocytosis assay. Blood samples were mixed with local anesthetic and treated as described previously. To determine the generation of reactive oxygen species, dihydroethidium (2.5  $\mu$ g/ml; Sigma, Deisenhofen, Germany) was added. Dihydroethidium is reduced to hydroethidium by reactive oxygen metabolites, emitting a stable fluorescence signal of 550–720 nm wavelength. Because of the broad emission spectrum of dihydroethidium during flow cytometric analysis (detection in channels 2 and 3), a staining with three fluorescence dyes is not feasible. As the uptake of bacteria was already quantified in the phagocytosis assay, unstained bacteria were used (in the same ratio as in the phagocytosis assay) to determine CD11b expression during phagocytosis.

After phagocytosis was stopped (10 and 30 min), as described previously, the samples were stained with a monoclonal antibody against CD11b (Mouse anti-Human CD11b; Caltag Laboratories, San Francisco, CA) for 20 min at room temperature, the erythrocytes were lysed (as in the phagocytosis assay), and the samples were prepared for flow cytometric analysis.

#### *Flow Cytometry*

Flow cytometric analysis was performed using FACS SORT (Cell Quest software package, version 3.1f; Becton Dickinson, Heidelberg, Germany). Unstained samples served as a control for the background fluorescence of dihydroethidium, collected through the 620-nm band

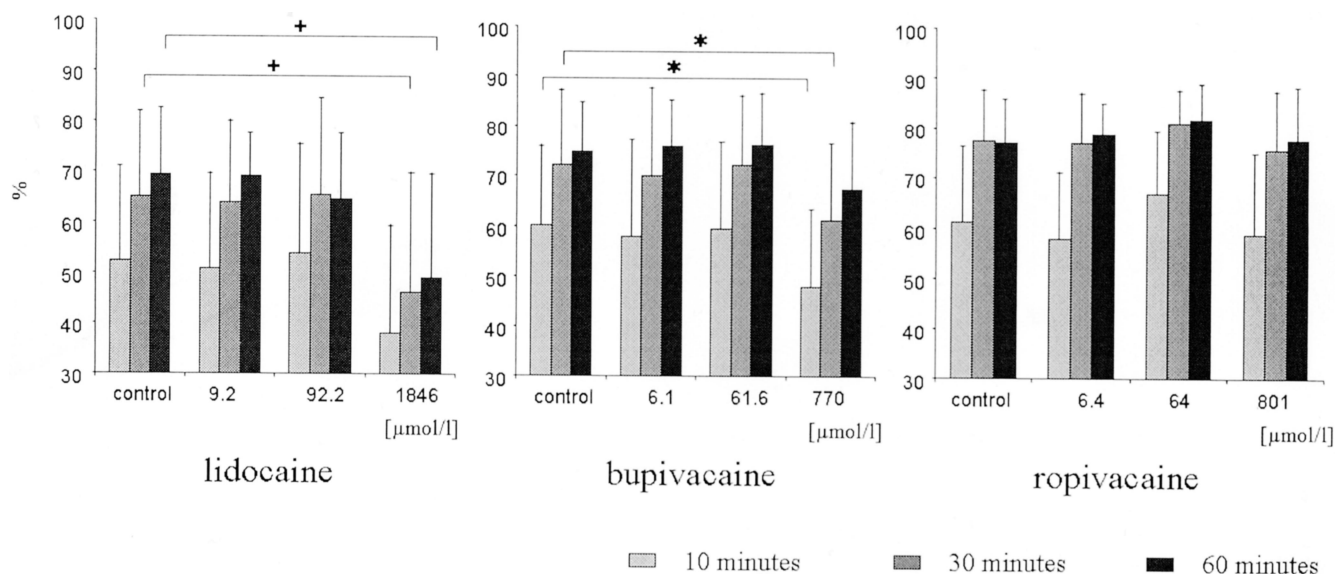

**Fig. 1.** Ratio of granulocytes (in percent) actively ingesting bacteria to total amount of granulocytes after 10, 30, and 60 min of exposure to local anesthetic. Data are presented as mean and SD. Significant inhibition of lidocaine occurred after 30 and 60 min ( $+P < 0.0002$ ), and significant inhibition of bupivacaine occurred after 0 and 30 min ( $*P < 0.005$ ).

pass filter. Isotype controls for each monoclonal antibody were used to define the cutoff for positive fluorescence.

Phagocytosis activity was determined in two different ways: as the ratio between the number of neutrophils ingesting bacteria and the total amount of neutrophils and as the fluorescence intensity of intracellular bacteria; the latter served as a semiquantitative measurement of bacterial uptake. Ten thousand granulocytes were analyzed in each sample.

#### Statistical Analysis

Statistical analysis was performed using the JMP<sup>®</sup> statistical software package (SAS Institute Inc., Cary, NC).

Analysis of variance (ANOVA) was performed, including blood donors as random effect and time, local anesthetic concentration, and their respective interaction as fixed factors. For each time point, differences between the local anesthetic concentration and the respective control were detected by Student *t* test with Bonferroni correction for multiple comparisons. Alpha was set at 0.05.

Comparisons among the local anesthetics were performed by ANOVA as well, including blood donors as random effect and local anesthetic concentrations and the different local anesthetics as fixed factors. To avoid multiple comparison problems, time effects were not

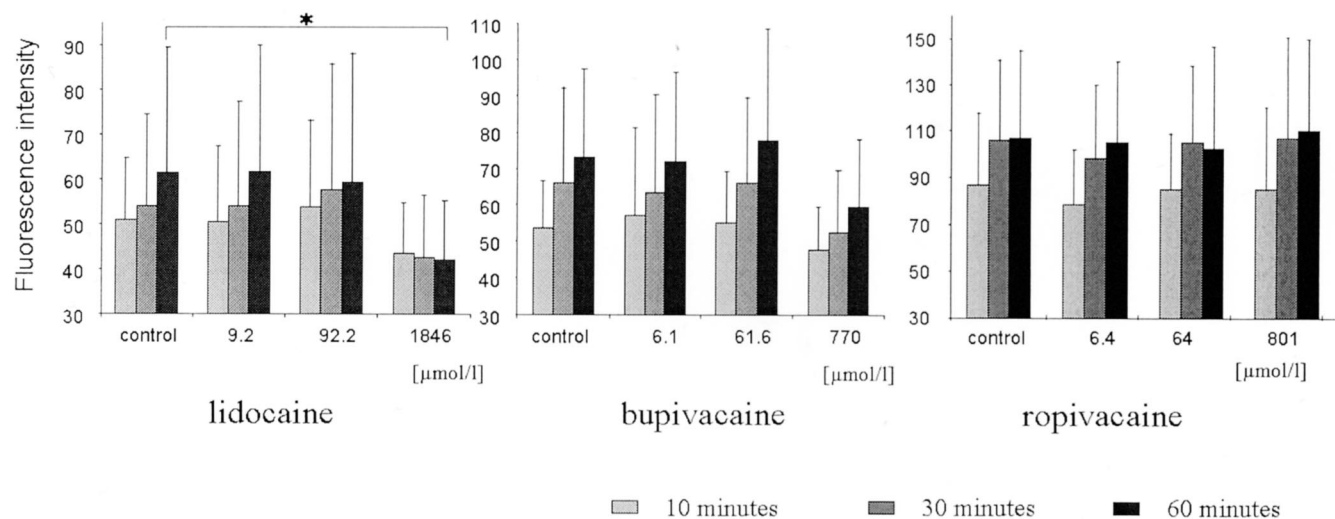

**Fig. 2.** Flow cytometric evaluation of fluorescence intensity of intracellular bacteria. Bacteria were stained with Calcein-AM (green channel fluorescence signal; Molecular Probes, Eugene, OR). Data after 10, 30, and 60 min are presented as mean and SD. Significant inhibition ( $*P < 0.003$ ) of bacterial uptake occurred at 60 min of lidocaine exposure.



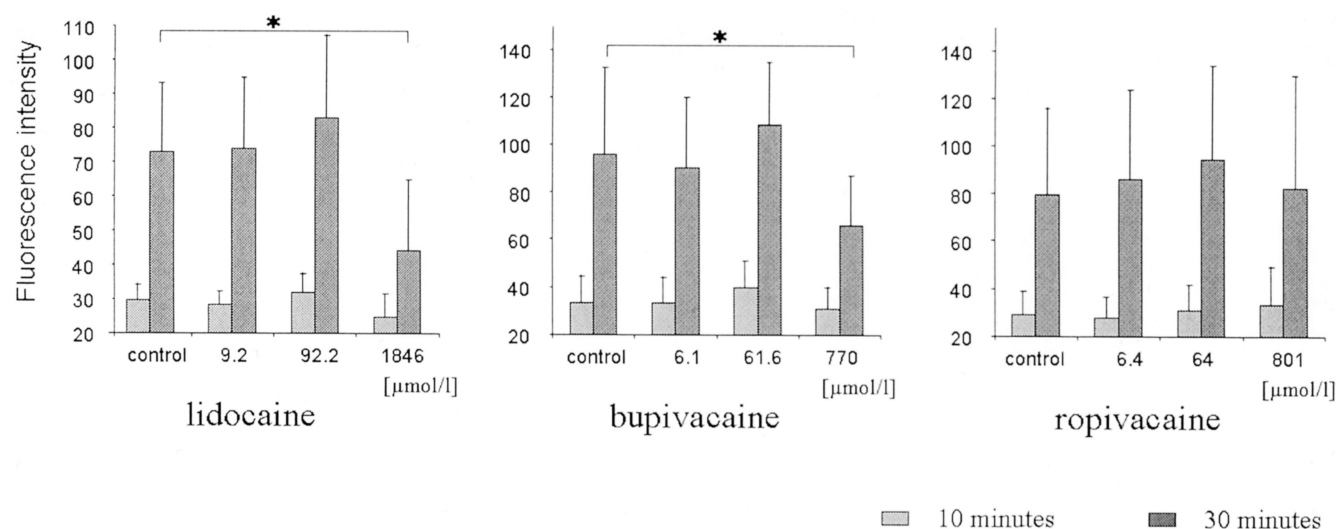

**Fig. 3.** Granulocyte oxidative burst during phagocytosis of *Staphylococcus aureus* and local anesthetic exposure. Fluorescence intensity of reactive oxygen metabolites is shown. Significant inhibition of lidocaine and bupivacaine occurred after 30 min (\* $P < 0.0001$ ).

evaluated. Normal distribution of the ANOVA residuals was assured (Shapiro-Wilk W test).

## Results

### Phagocytosis Activity

Ropivacaine, at all concentrations and at all time points investigated, had no effect on the percentage of granulocytes ingesting bacteria. Lidocaine and bupivacaine inhibited phagocytosis but with different time courses. After 10 min of incubation, the percentage of granulocytes ingesting bacteria was decreased to 80% by bupivacaine (770  $\mu\text{M}$ ;  $P < 0.002$  compared with control) but not by lidocaine. After 30 min of incubation, the per-

centage of granulocytes that ingested *S. aureus* was decreased to 71% by lidocaine (1,846  $\mu\text{M}$ ;  $P < 0.0002$ ) and to 85% by bupivacaine (770  $\mu\text{M}$ ;  $P < 0.001$ ; fig. 1). After 60 min of incubation, only lidocaine (1,846  $\mu\text{M}$ ) significantly reduced the number of granulocytes that ingested bacteria (to 71%;  $P < 0.0001$ ). Hence, the effects of the three local anesthetics at these concentrations were significantly different from one another ( $P < 0.02$ ). At lower concentrations, none of the local anesthetics affected the number of granulocytes that ingested bacteria.

In addition, the uptake of labeled *S. aureus* was semi-quantitatively determined by measuring the intracellular

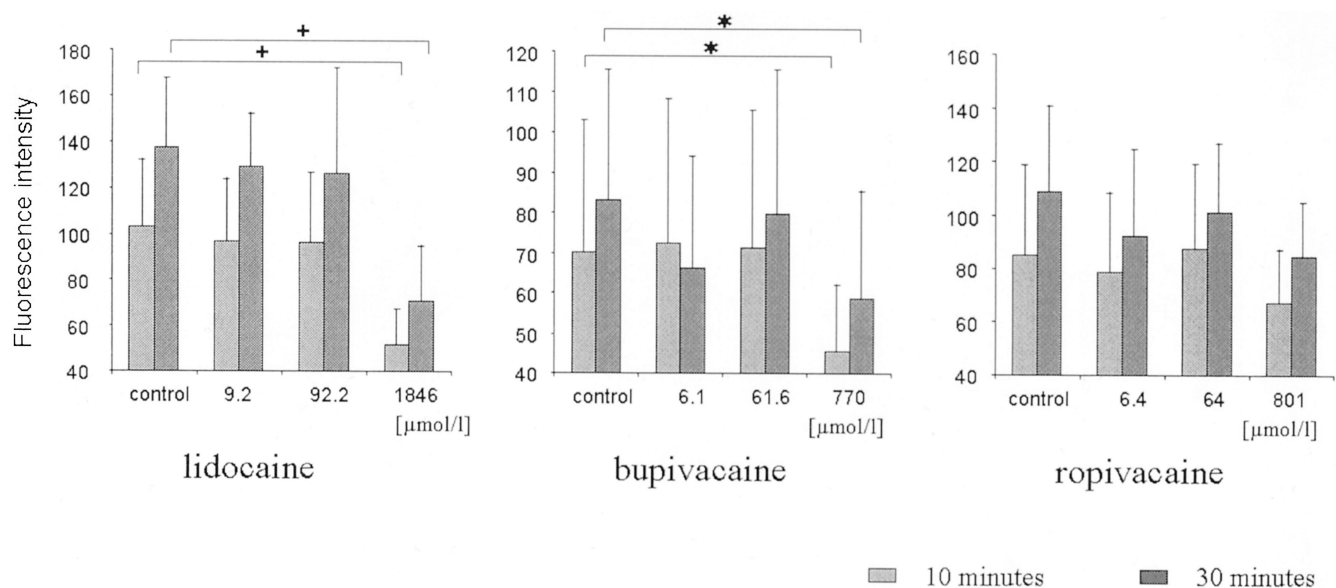

**Fig. 4.** Granulocyte CD11b expression during phagocytosis of *Staphylococcus aureus* and local anesthetic exposure. Significant inhibition of CD11b upregulation occurred during exposure to lidocaine (+ $P < 0.0001$ ) and bupivacaine (\* $P < 0.006$ ) in the highest concentration.

fluorescence signal. The fluorescence intensity of *S. aureus* was significantly decreased to 68% by lidocaine at 60 min (1,846  $\mu\text{M}$ ;  $P < 0.003$ ). For bupivacaine (770  $\mu\text{M}$ ), a trend toward fewer intracellular bacteria could be observed but did not reach statistical significance (fig. 2). As a result, the effects of lidocaine and bupivacaine at these concentrations were significantly different from those of ropivacaine ( $P < 0.0001$ ).

#### Oxidative Burst

A significant reduction in oxidative burst—to 61 and to 69%—was observed at 30 min for lidocaine (1,846  $\mu\text{M}$ ;  $P < 0.0001$ ) and bupivacaine (770  $\mu\text{M}$ ;  $P < 0.0001$ ), respectively. Ropivacaine did not have any effect on oxidative burst (fig. 3). However, due to substantial variability, no significant differences among the local anesthetics were observed.

#### CD11b Expression

CD11b expression was reduced at 10 and 30 min by lidocaine (1,846  $\mu\text{M}$ ; to 50 and 52%) and by bupivacaine (770  $\mu\text{M}$ ; to 65 and 70%), respectively ( $P < 0.006$ ). For ropivacaine (801  $\mu\text{M}$ ), a trend toward reduced expression of CD11b to 79% (10 min) and to 78% (30 min) was observed but did not reach statistical significance (fig. 4). The effect of lidocaine was significantly different from that of the other local anesthetics ( $P < 0.0001$ ), whereas no differences in effect were observed between bupivacaine and ropivacaine.

### Discussion

The present study investigated the effects of lidocaine, bupivacaine, and ropivacaine on granulocyte phagocytosis activity, oxidative burst, and CD11b expression. All three parameters were significantly attenuated by lidocaine or bupivacaine in their highest concentrations (1,846 and 770  $\mu\text{M}$ , respectively). The uptake of intracellular bacteria was significantly affected following lidocaine exposure only. Treatment with ropivacaine showed only a nonsignificant trend toward reduced CD11b expression in the highest concentration (801  $\mu\text{M}$ ).

Lidocaine previously has been shown to inhibit phagocytosis of radiolabeled *S. aureus*,<sup>14</sup> heat-killed *Escherichia coli*,<sup>16</sup> or latex particles<sup>15</sup> in isolated leukocytes. This study confirms these findings for a whole blood assay and adds new evidence suggesting comparable inhibitory effects of bupivacaine but lack of ropivacaine interference with bacterial ingestion. In addition, we observed a significant decrease in the number of leukocytes actively participating in phagocytosis after lidocaine exposure. Ropivacaine, in contrast, affected neither bacterial ingestion nor the overall number of active phagocytes.

The effects of lidocaine on oxidative burst stimulated by bacterial surface antigens,<sup>16</sup> yeast particles,<sup>13,18</sup> or

intracellular stimuli, like phorbol myristate acetate, have been well documented.<sup>13,15,17,22</sup> Our data show that lidocaine similarly affects respiratory burst activated by *S. aureus* phagocytosis. In contrast, the effects of bupivacaine and ropivacaine on oxidative burst are variably reported. Mikawa *et al.*<sup>19</sup> did not observe any effect of bupivacaine on zymosan-stimulated oxidative burst, whereas Sinclair *et al.*<sup>18</sup> reported suppression by bupivacaine in concentrations comparable to those used in this study. Cederholm *et al.*<sup>23</sup> could not show significant effects of bupivacaine or ropivacaine on respiratory burst induced by phorbol myristate acetate, whereas Hollmann *et al.*<sup>22</sup> and Fischer *et al.*<sup>24</sup> demonstrated inhibitory activity of both local anesthetics on chemotaxis and oxygen production in granulocytes primed with platelet-activating factor and activated with *N*-formyl-methionine-leucine-phenylalanine. The differences between these studies may be a result of the various stimuli and incubation times used. Hollmann *et al.*<sup>25,26</sup> recently demonstrated that local anesthetics influence intracellular signaling by interfering with  $G_q$  proteins, resulting in the blockage of neutrophil priming. In our study, differentiation between priming and activation effects was not possible because viable *S. aureus* was applied as a single stimulus.

CD11b, an adhesion molecule in the  $\beta_2$ -integrin family, is rapidly upregulated after neutrophil activation and plays a crucial role by allowing firm adhesion of rolling leukocytes to the endothelium,<sup>27,28</sup> thereby initiating the first step in extravasation of leukocytes to sites of inflammation. Moreover, CD11b is the predominant leukocyte surface-binding site for opsonized *S. aureus* and is responsible for both recognition and binding. Bound *S. aureus* is rapidly internalized into phagocytes (*via* phagosomes) and degraded (*via* oxidative burst and enzymatically) after interaction with the CD11b receptor. The most pronounced local anesthetic effect observed in our study was on CD11b expression. Inhibition of CD11b expression by lidocaine and ropivacaine has already been reported for *N*-formyl-methionine-leucine-phenylalanine-stimulated or tumor necrosis factor  $\alpha$ -stimulated leukocytes.<sup>20,29</sup> In our study, CD11b expression was decreased by lidocaine and bupivacaine during phagocytosis of viable *S. aureus*. This would be expected to result in compromised ingestion of viable *S. aureus* by leukocytes.

We observed significant differences in effect among the various anesthetics. This could imply that either nonequipotent concentrations were used or that various local anesthetics have different pharmacologic effects on leukocyte function. Statements regarding equipotency are difficult to make since we investigated a novel phenomenon for which anesthetic sensitivity has not been described. Clearly, "equipotent" concentrations, as described for analgesia, are irrelevant in the present setting since local anesthesia is largely mediated by the blockage

of sodium channels, which are not expressed in leukocytes.<sup>30</sup> Therefore, we decided to study a wide range of concentrations, anchored in clinical relevance. For each of the local anesthetics, we chose the lowest concentration to correspond to plasma concentrations observed following regional anesthetic procedures.<sup>31-35</sup> In addition, we studied a concentration 10-fold greater than and a concentration corresponding to 100 times the peak plasma levels observed after regional anesthesia. As a result, we studied a greater than 100-fold range of concentrations. Unfortunately, almost no data exist on a more useful measure in the current context: tissue concentrations of local anesthetic at the site of injection (e.g., after regional blocks, which are performed with high volumes and concentrated local anesthetics). After subarachnoid block, millimolar concentrations are obtained near the spinal cord.<sup>36</sup> After brachial plexus block, tissue ropivacaine concentrations were approximately 50 times greater than those subsequently observed in plasma.<sup>34,35</sup> By extrapolating, it can be assumed that tissue concentrations are at least 10-fold greater than systemic concentrations. In addition, local anesthetics are frequently applied over the period of days or weeks. *In vitro* studies describe an increasing susceptibility of leukocytes to local anesthetics with increasing exposure time.<sup>37</sup> Thus, even lower local anesthetic concentrations may result in compromised leukocyte function in cases involving prolonged exposure times. Together, these data indicate that the concentrations used in this study may, indeed, be relevant in the clinical setting.

Although the results of this *in vitro* study cannot be extrapolated to local anesthetic actions *in vivo* and in clinical practice, our data at least suggest the possibility of clinically relevant effects on leukocyte functions at sites with high local anesthetic concentrations. However, the limitations of the *in vitro* model must be emphasized since under experimental conditions, only effects on an isolated system are observed, whereas *in vivo*, leukocytes and *S. aureus* interact with a variety of cellular and noncellular targets, including the tissue immune system and circulating blood cells other than neutrophils. Nonetheless, our findings may be of clinical relevance in subpopulations of patients with preexisting compromised immune status, diabetes mellitus, malignancies, use of antiinflammatory medication, or long-term analgesia for chronic pain syndromes, in whom a 10-fold increase in the incidence of epidural abscess, as compared with healthy subjects, has been reported.<sup>38</sup> Our data suggest that ropivacaine, which showed limited effects on leukocyte function, may be the preferred local anesthetic for prolonged regional anesthesia in such patients.

The authors are deeply indebted to Marcel E. Durieux, M.D., Ph.D. (Professor and Chairman, Department of Anesthesiology, University Hospital, Maastricht, The Netherlands), for his expertise in discussing and interpreting the data and his

dedicated support in writing and revising the manuscript. The authors also thank Joan Robertson-Hoehne, M.D. (Family Practitioner, Stuttgart, Germany), for copy-editing the manuscript.

## References

1. Lee R, Nitta T, Schmid RA, Schuessler RB, Harris KM, Gay WAJ: Retrograde infusion of lidocaine or L-arginine before reperfusion reduces myocardial infarct size. *Ann Thorac Surg* 1998; 65:1353-9
2. Nishina K, Mikawa K, Takao Y, Shiga M, Maekawa N, Obara H: Intravenous lidocaine attenuates acute lung injury induced by hydrochloric acid aspiration in rabbits. *ANESTHESIOLOGY* 1998; 88:1300-9
3. Mikawa K, Maekawa N, Nishina K, Takao Y, Yaku H, Obara H: Effect of lidocaine pretreatment on endotoxin-induced lung injury in rabbits. *ANESTHESIOLOGY* 1994; 81:689-99
4. Martinsson T, Ljung T, Rubio C, Hellstrom PM: Beneficial effects of ropivacaine in rat experimental colitis. *J Pharmacol Exp Ther* 1999; 291:642-7
5. Arlander E, Öst A, Stahlberg D, Löfberg R: Ropivacaine gel in active distal ulcerative colitis and proctitis - a pharmacokinetic and exploratory clinical study. *Aliment Pharmacol Ther* 1996; 10:73-81
6. Hillingsø JG, Kjeldsen J, Schmidt PT, Rasmussen TN, Fisher-Hansen B, Holst JJ, Lauristen K, Bukhave K, Rask-Madsen J: Effects of topical ropivacaine on eicosanoids and neurotransmitters in the rectum of patients with distal ulcerative colitis. *Scand J Gastroenterol* 2002; 37:325-9
7. Morris T, Appleby R: Retardation of wound healing by procaine. *Br J Surg* 1980; 67:391-2
8. Powell DM, Rodeheaver GT, Foresman PA, Hankins CL, Bellian KT, Zimmer CA, Becker DG, Edlich RF: Damage to tissue defenses by EMLA cream. *J Emerg Med* 1991; 9:205-9
9. Kindler CH, Seeberger MD, Staender SE: Epidural abscess complicating epidural anesthesia and analgesia. *Acta Anaesthesiol Scand* 1998; 42:614-20
10. Feldman JM, Chapin-Robertson K, Turner J: Do agents used for epidural analgesia have antimicrobial properties? *Reg Anesth* 1994; 19:43-7
11. Parr AM, Zoutman DE, Davidson JSD: Antimicrobial activity of lidocaine against bacteria associated with nosocomial wound infection. *Ann Plast Surg* 1999; 43:239-45
12. Sakuragi T, Ishino H, Dan K: Bactericidal activity of preservative free bupivacaine on microorganisms in the human skin flora. *Acta Anaesthesiol Scand* 1998; 42:1096-9
13. Hammer R, Dahlgren C, Stendahl O: Inhibition of human leukocyte metabolism and random mobility by local anaesthesia. *Acta Anaesthesiol Scand* 1985; 29:520-3
14. Vandenbroucke-Gauls CM, Thijssen RM, Marcelis JH, Sharma SD, Verhoef J: Effects of lysosomotropic amines on human polymorphonuclear leukocyte function. *Immunology* 1984; 51:319-26
15. Cullen BF, Haschke RH: Local anesthetic inhibition of phagocytosis and metabolism of human leukocytes. *ANESTHESIOLOGY* 1974; 40:142-6
16. Azuma Y, Shinohara M, Wang P-L, Sueue Y, Yasuda H, Ohura K: Comparison of local anesthetics on immune functions of neutrophils. *Int J Immunopharmacol* 2000; 22:789-96
17. Hyvönen PM, Kowolik MJ: Dose-dependent suppression of the neutrophil respiratory burst by lidocaine. *Acta Anaesthesiol Scand* 1998; 42:565-9
18. Sinclair R, Eriksson AS, Gretzer C, Cassuto J, Thomsen P: Inhibitory effects of amide local anesthetics on stimulus-induced human leukocyte metabolic activation, LTB<sub>4</sub> release and IL1 secretion *in vitro*. *Acta Anaesthesiol Scand* 1993; 37:159-65
19. Mikawa K, Akamatsu H, Nishina K, Shiga M, Maekawa N, Obara H, Niwa Y: Inhibitory effect of local anesthetics on reactive oxygen species production by human neutrophils. *Acta Anaesthesiol Scand* 1997; 41:524-8
20. Martinsson T, Oda T, Fernvik E, Roempke K, Dalsgaard CJ, Svensjö E: Ropivacaine inhibits leukocyte rolling, adhesion and CD11b/CD18 expression. *J Pharmacol Exp Ther* 1997; 283:59-65
21. Gordon DL, Rice JL, McDonald PJ: Regulation of human neutrophil type 3 complement receptor (iC3b receptor) expression during phagocytosis of *Staphylococcus aureus* and *Escherichia coli*. *Immunology* 1989; 67:460-5
22. Hollmann MW, Gross A, Jelacin N, Durieux ME: Local anesthetic effects on priming and activation of human neutrophils. *ANESTHESIOLOGY* 2001; 95:113-22
23. Cederholm I, Briheim G, Rutberg H, Dahlgren C: Effects of five amino-amide local anesthetic agents on human polymorphonuclear leukocytes measured by chemiluminescence. *Acta Anaesthesiol Scand* 1994; 38:704-10
24. Fischer LG, Bremer M, Coleman EJ, Conrad B, Krumm B, Gross A, Hollmann MW, Mandell G, Durieux ME: Local anesthetics attenuate lysophosphatidic acid-induced priming of human neutrophils. *Anesth Analg* 2001; 92:1041-7
25. Hollmann MW, Wieczorek KS, Berger A, Durieux ME: Local anesthetic inhibition of G protein-coupled receptor signaling by interference with Gα<sub>14</sub>(q) protein function. *Mol Pharmacol* 2001; 59:294-301
26. Hollmann MW, DiFazio CA, Durieux ME: Ca-signaling G-protein-coupled receptors: A new site of local anesthetic action? *Reg Anesth Pain Med* 2001; 26:565-71
27. Smith CW: Endothelial adhesion molecules and their role in inflammation. *Can J Physiol Pharmacol* 1993; 71:76-87

28. Bevilacqua MP, Nelson RM, Mannori G, Cecconi O: Endothelial-leukocyte adhesion molecules in human disease. *Annu Rev Med* 1994; 45:361-78
29. Ohsaka A, Saionji K, Igari J: Local anesthetic lidocaine inhibits the effect of granulocyte colony-stimulating factor on human neutrophil functions. *Exp Hematol* 1994; 22:460-6
30. Krause KH, Demaurex N, Jacon M, Lew DP: Ion channels and receptor-mediated  $\text{Ca}^{2+}$  influx in neutrophil granulocytes. *Blood Cells* 1993; 19: 165-73
31. Burm AG, Stienstra R, Brouwer RP, Emanuelsson BM, van Kleef JW: Epidural infusion of ropivacaine for postoperative analgesia after major orthopedic surgery. *ANESTHESIOLOGY* 2000; 93:395-403
32. Quitmann J, Kern A, Wulf H: Pharmacokinetics of ropivacaine during extradural anesthesia for total hip replacement. *J Clin Anesth* 2000; 12:36-9
33. Chan VWS, Weisbrod MJ, Kazas Z, Dragomir C: Comparison of ropivacaine and lidocaine for intravenous regional anesthesia in volunteers. *ANESTHESIOLOGY* 1999; 90:1602-8
34. Ala-Kokko TI, Löppönen A, Alahuhta S: Two instances of central nervous system toxicity in the same patient following repeated ropivacaine-induced brachial plexus block. *Acta Anaesthesiol Scand* 2000; 44:623-6
35. Vainionpää VA, Haavisto ET, Huha TM, Korpi KJ, Nuutinen LS, Hollmen AI, Jozwiak HM, Magnusson AA: A clinical and pharmacokinetic comparison of ropivacaine and bupivacaine in axillary plexus block. *Anesth Analg* 1995; 81:534-8
36. Holst D, Mollmann M, Scheuch E, Meissner K, Wendt M: Intrathecal local anesthetic distribution with the new spinocath catheter. *Reg Anesth Pain Med* 1998; 23:463-8
37. Wiczorek K, Hollmann MW, Graf BM, Martin E, Durieux ME: Local anesthetics inhibit lysophosphatidate signaling time and pH dependent (abstract). *Anesthesiologie und Intensivmedizin* 2000; 41:385
38. Du Pen SL, Peterson DG, Williams A, Bogosian AJ: Infection during chronic epidural catheterization: Diagnosis and treatment. *ANESTHESIOLOGY* 1990; 73:905-9
